# Supplementary material for: High radiative efficiency based on intramolecular charge transfer in a 9,9′-bianthracene-ortho-carboranyl luminophore
Source: Royal Society of Chemistry journal article supplement (doi:10.1039/d3dt01086d), 2023-01-01
Supplement: d3dt01086d1.pdf [file d3dt01086d1.pdf]

## Electronic supplementary information

# High radiative efficiency based on intramolecular charge transfer in 9,9'-bianthracene-*ortho*-carboranyl luminophore

Mingi Kim,<sup>a‡</sup> Sanghee Yi,<sup>a‡</sup> Dongwook Kim,<sup>b</sup> Ilsup Shin,<sup>a</sup> Yung Ju Seo,<sup>a</sup>  
Dong Kyun You,<sup>a</sup> Chan Hee Ryu,<sup>a</sup> and Kang Mun Lee<sup>\*a</sup>

<sup>a</sup> Department of Chemistry, Institute for Molecular Science and Fusion Technology, Kangwon National University, Chuncheon 24341, Republic of Korea.

<sup>b</sup> Center for Catalytic Hydrocarbon Functionalizations, Institute for Basic Science (IBS), Daejeon 34141, Republic of Korea.

<sup>‡</sup>The first and second authors contributed equally to this work.

## Contents

|                                                                                                         |         |
|---------------------------------------------------------------------------------------------------------|---------|
| Multinuclear NMR spectra for <b>9biAT</b> and its precursor .....                                       | S2–S4   |
| Crystallographic data and parameters for <b>9biAT</b> .....                                             | S5      |
| Selected bond lengths (Å) and angles (°) for <b>9biAT</b> .....                                         | S6      |
| UV-vis absorption and PL spectra for anthracene .....                                                   | S7      |
| Emission decay curves for <b>9biAT</b> in solid and aggregated state .....                              | S8      |
| Emission decay curves for <b>9biAT</b> in solution state .....                                          | S9      |
| Theoretical calculation results for <b>9biAT</b> .....                                                  | S10–S12 |
| Cartesian coordinates for <b>9biAT</b> .....                                                            | S13–S14 |
| Atomic charge for S <sub>1</sub> -optimized structure of <b>9biAT</b> in various organic solvents ..... | S15–S19 |

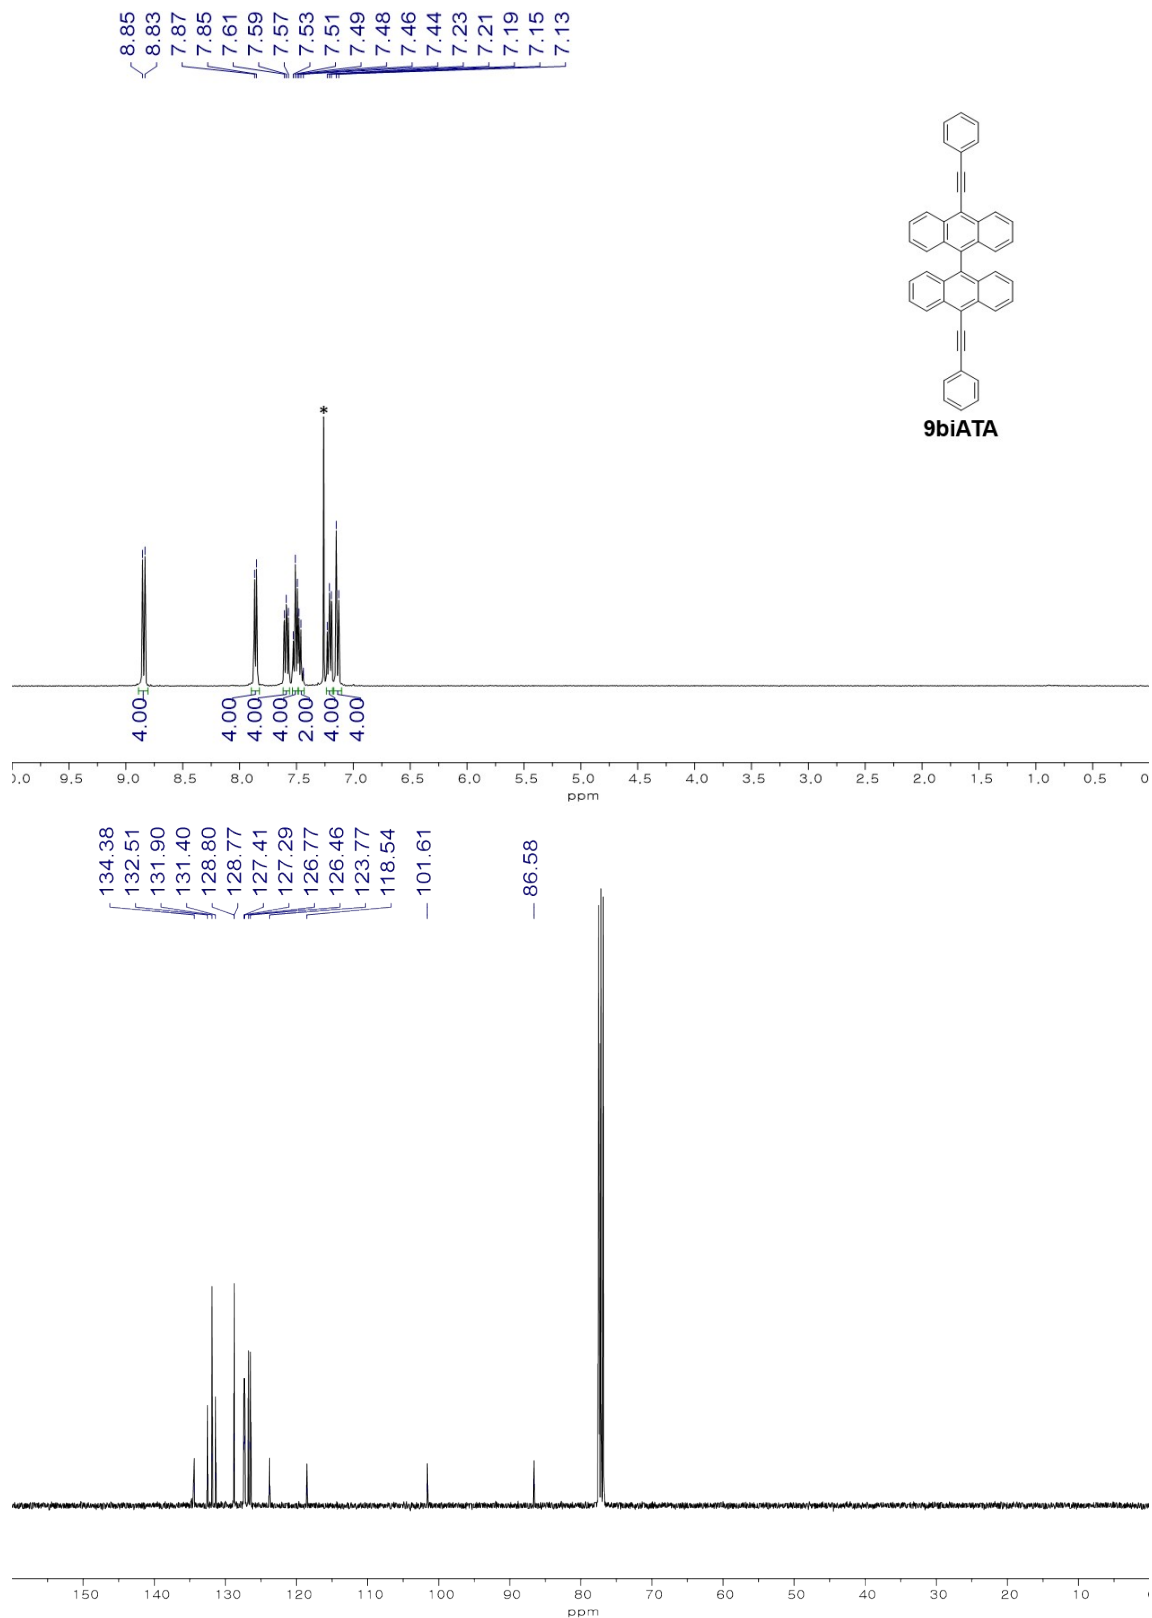

**Fig. S1** <sup>1</sup>H (top) and <sup>13</sup>C (bottom) NMR spectra of **9biATA** in CDCl<sub>3</sub> (\* from residual CHCl<sub>3</sub> in CDCl<sub>3</sub>).



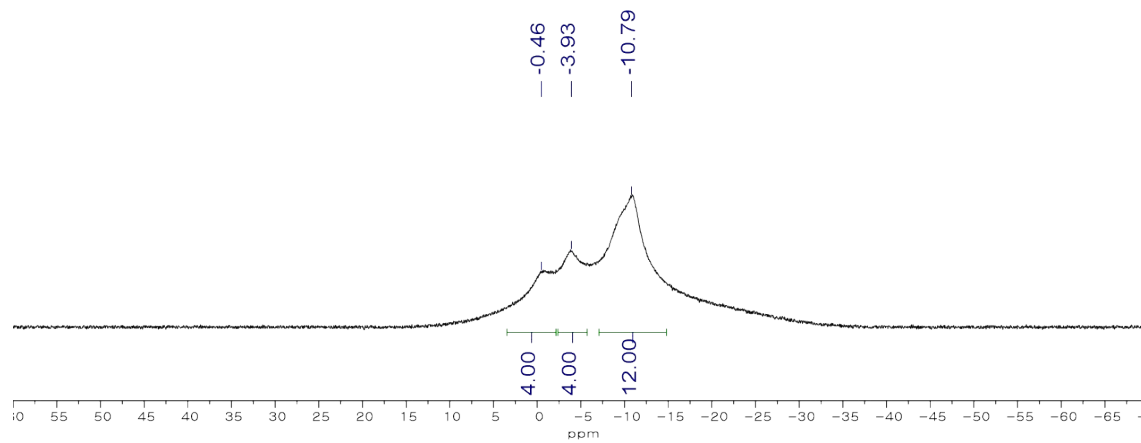

**Fig. S3**  $^{11}\text{B}\{^1\text{H}\}$  (top) NMR spectrum of **9biAT** in  $\text{THF-}d_8$ .

**Table S1** Crystallographic data and parameters for **9biAT**.

| Compound                                                               | <b>9biAT</b>                                                        |
|------------------------------------------------------------------------|---------------------------------------------------------------------|
| Formula                                                                | C <sub>44</sub> H <sub>46</sub> B <sub>20</sub>                     |
| Formula weight                                                         | 791.01                                                              |
| Crystal system                                                         | Triclinic                                                           |
| Space group                                                            | <i>P</i> <sub>-1</sub>                                              |
| <i>a</i> (Å)                                                           | 11.9622(7)                                                          |
| <i>b</i> (Å)                                                           | 13.4561(8)                                                          |
| <i>c</i> (Å)                                                           | 14.6657(9)                                                          |
| <i>α</i> (°)                                                           | 75.096(2)                                                           |
| <i>β</i> (°)                                                           | 73.810(2)                                                           |
| <i>γ</i> (°)                                                           | 79.007(2)                                                           |
| <i>V</i> (Å <sup>3</sup> )                                             | 2172.7(2)                                                           |
| <i>Z</i>                                                               | 2                                                                   |
| $\rho_{\text{calc}}$ (g cm <sup>-3</sup> )                             | 1.209                                                               |
| $\mu$ (mm <sup>-1</sup> )                                              | 0.061                                                               |
| <i>F</i> (000)                                                         | 820                                                                 |
| <i>T</i> (K)                                                           | 296(2)                                                              |
| Scan mode                                                              | $\varphi$ and $\omega$ scan                                         |
| <i>hkl</i> range                                                       | -14 < <i>h</i> < 14,<br>-16 < <i>k</i> < 16,<br>-17 < <i>l</i> < 17 |
| Measd reflns                                                           | 32778                                                               |
| Unique reflns [ <i>R</i> <sub>int</sub> ]                              | 7915 [0.0929]                                                       |
| Reflns used for refinement                                             | 7915                                                                |
| Refined parameters                                                     | 577                                                                 |
| <i>R</i> <sub>1</sub> <sup><i>a</i></sup> ( <i>I</i> > 2σ( <i>I</i> )) | 0.0804                                                              |
| <i>wR</i> <sub>2</sub> <sup><i>b</i></sup> all data                    | 0.2004                                                              |
| GOF on <i>F</i> <sup>2</sup>                                           | 0.981                                                               |
| $\rho_{\text{fin}}$ (max/min) (e Å <sup>-3</sup> )                     | 0.198, -0.196                                                       |

$$^a \quad R_1 = \frac{\sum ||F_o| - |F_c||}{\sum |F_o|} \quad ^b \quad wR_2 = \left\{ \frac{\sum w(F_o^2 - F_c^2)^2}{\sum w(F_o^2)^2} \right\}^{1/2}.$$

**Table S2** Selected bond lengths (Å) and angles (°) for **9biAT**

| Compound   | <b>9biAT</b> |
|------------|--------------|
|            | length (Å)   |
| C9–C13     | 1.427(4)     |
| C9–C15     | 1.522(4)     |
| C15–C16    | 1.829(4)     |
|            | angles (°)   |
| C13–C9–C15 | 120.3(3)     |
| C9–C15–C16 | 116.6(2)     |

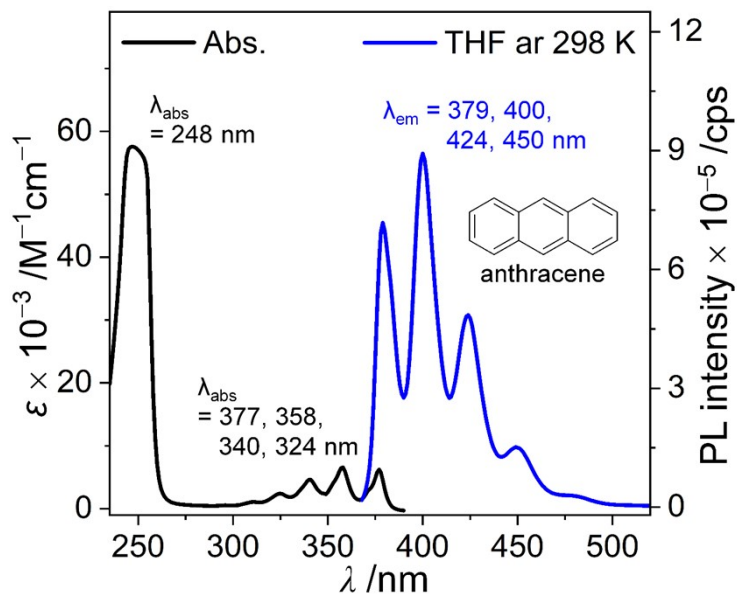

**Fig. S4** UV-vis absorption (left side) and PL spectra (right side) for anthracene in THF ( $4.0 \times 10^{-5} \text{ M}$ ,  $\lambda_{\text{ex}} = 358 \text{ nm}$ ).

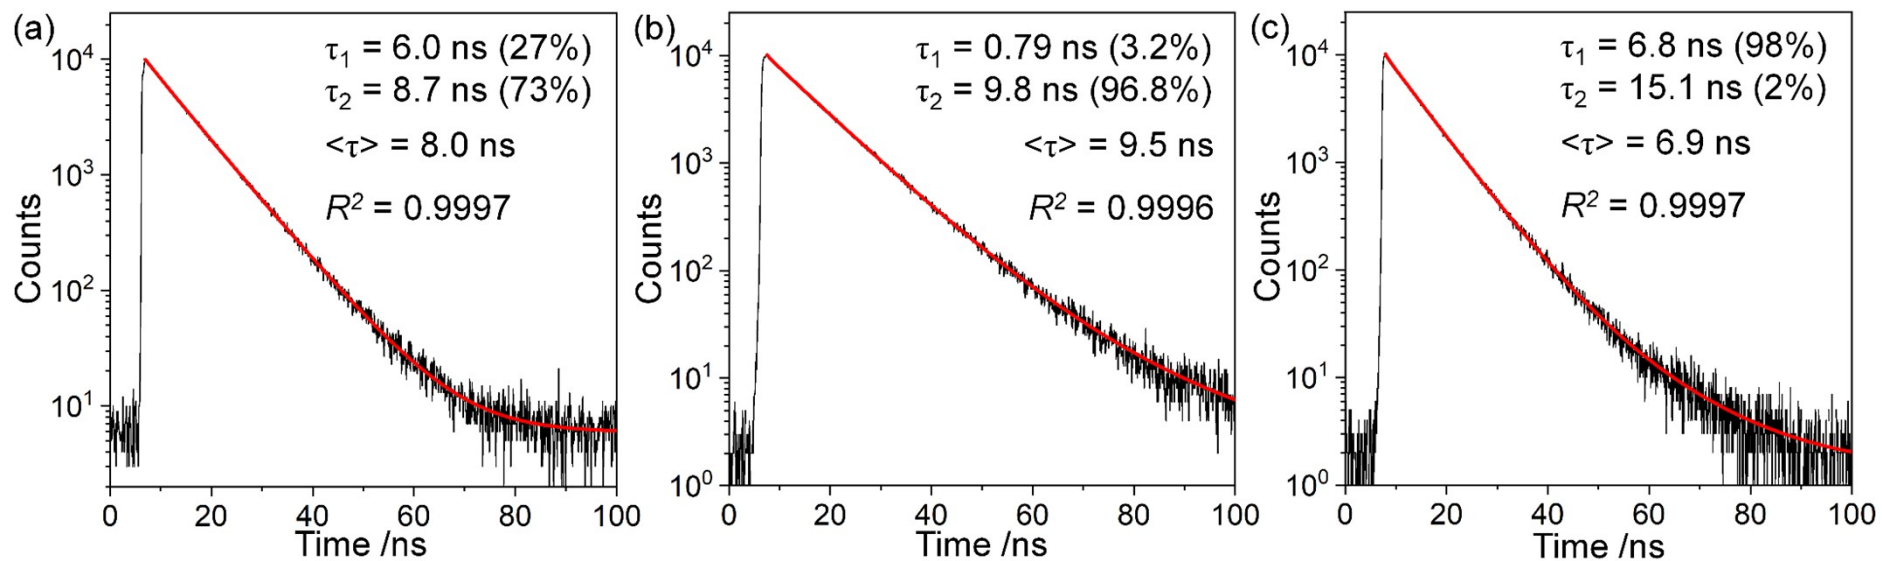

**Fig. S5** Emission decay curves for **9biAT** in (a) film (5 wt% doped with PMMA), (b) in  $f_w$  (water fraction in a THF–water mixture) = 90% ( $2.0 \times 10^{-5}$  M), and (c) crystalline states detected at each emissive maxima at 298 K. Each red-line is its double exponential fitting curve for the decay curves.



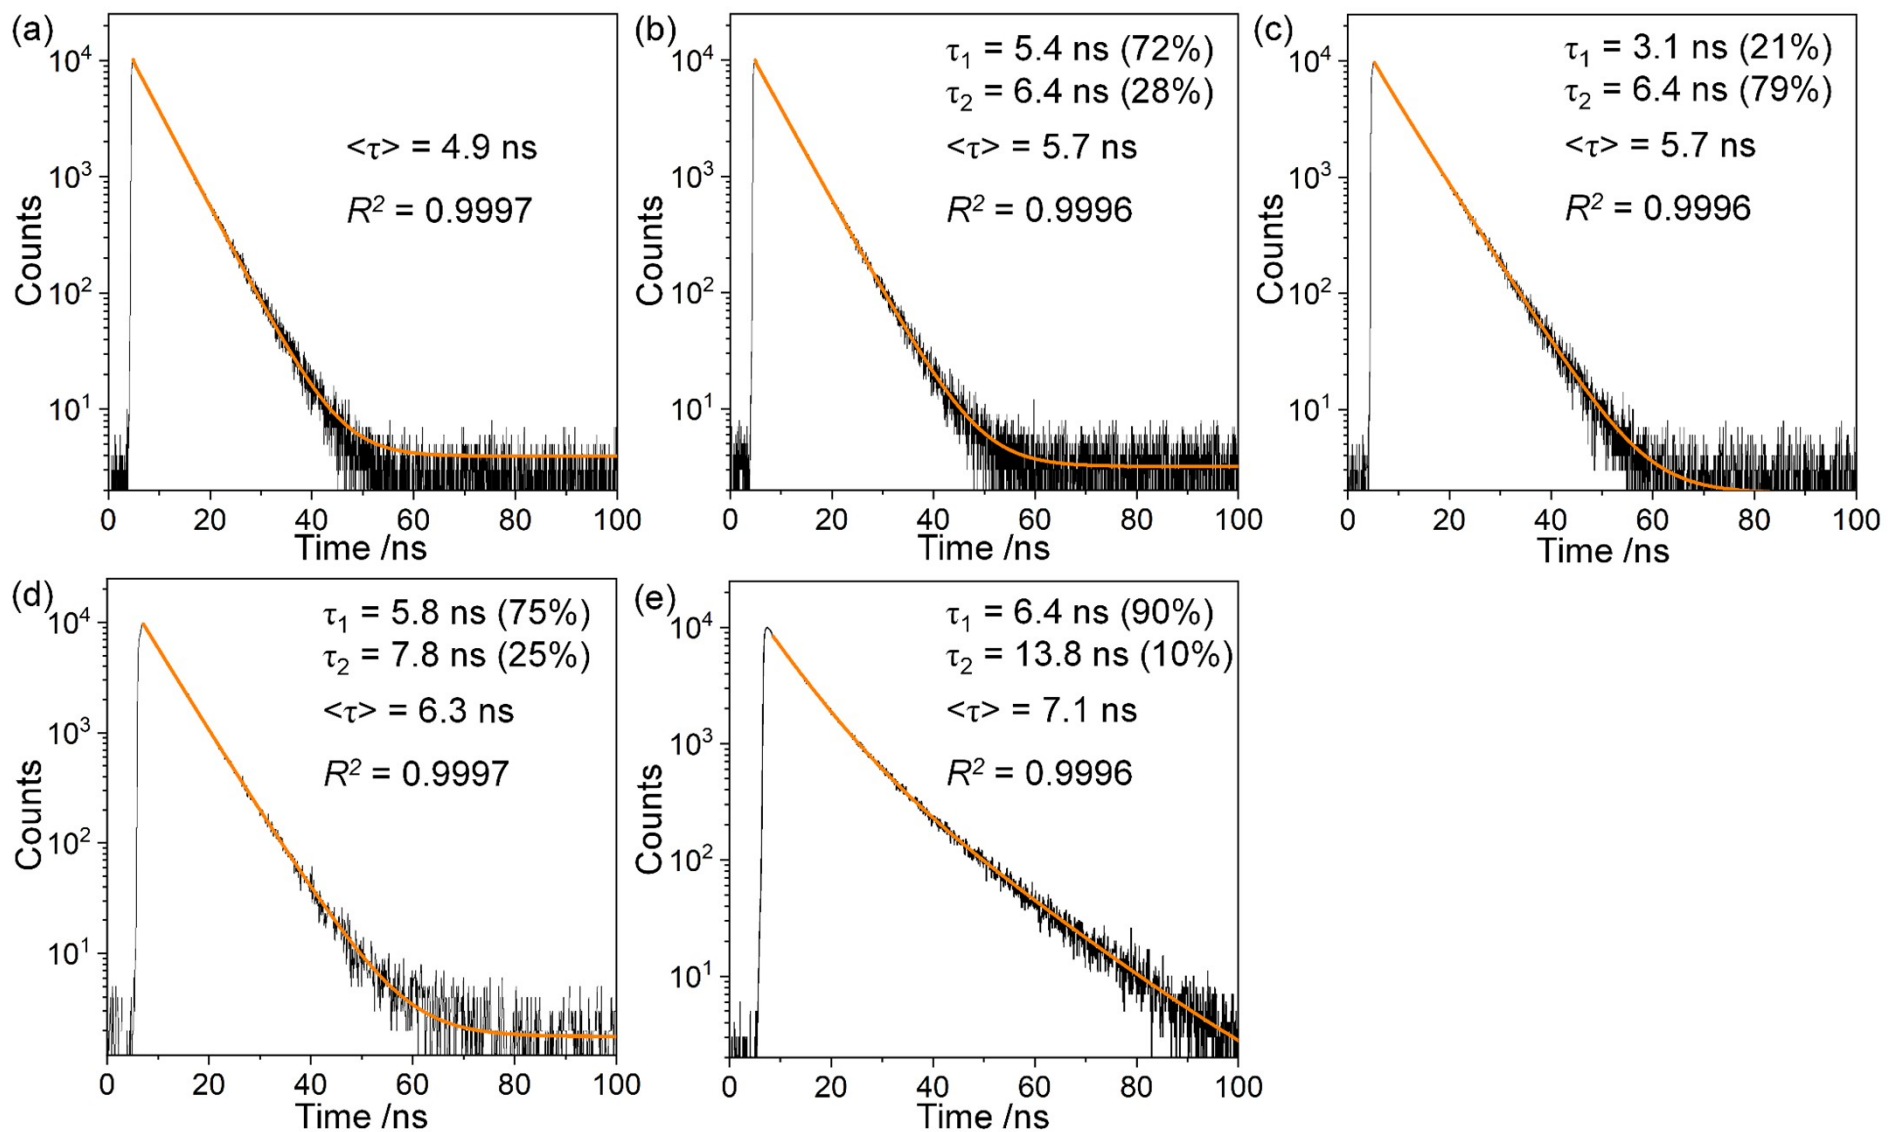

**Fig. S6** Emission decay curves for **9biAT** in (a) cyclohexane ( $2.0 \times 10^{-5}$  M), (b) toluene, (c) diethyl ether, (d) tetrahydrofuran, and (e) dichloromethane detected at each emissive maxima at 298 K. Each orange-line is its single or double exponential fitting curve for the decay curves.

### Computational calculation detail

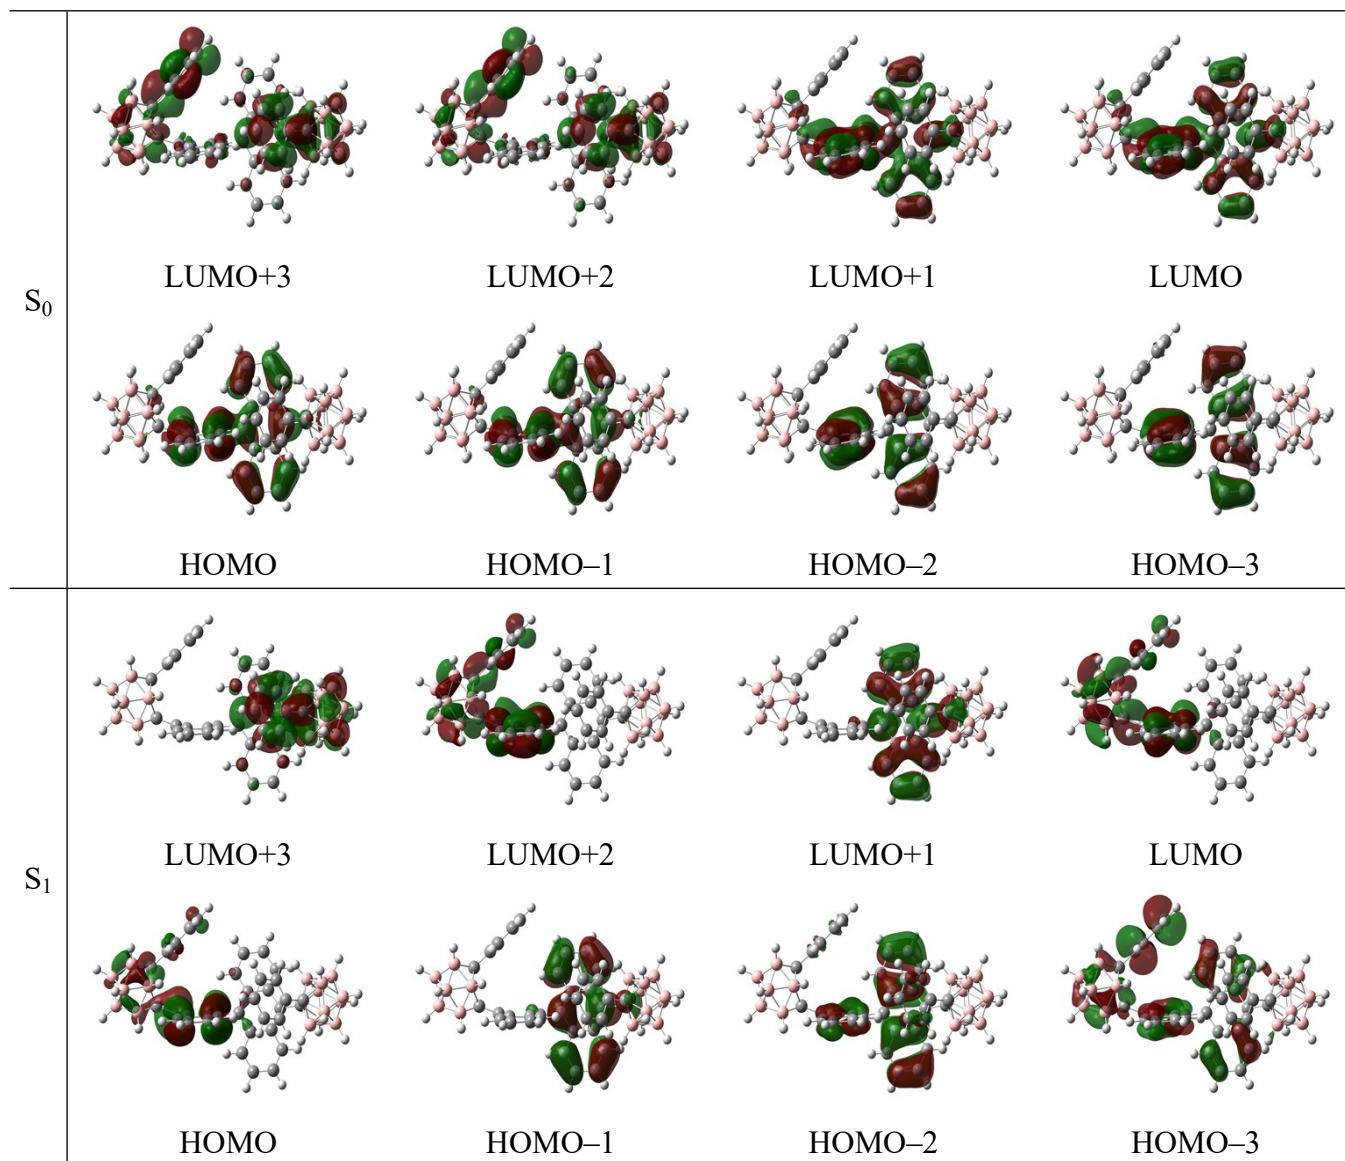

**Fig. S7** The selected frontier orbitals of **9biAT** from PBE0 calculations (Isovalue = 0.04 a.u.) at the ground state ( $S_0$ ) and first singlet excited state ( $S_1$ ) optimised geometries in THF.

**Table S3** Computed absorption wavelengths ( $\lambda_{\text{calc}}$  in nm) and oscillator strengths ( $f_{\text{calc}}$ ) for **9biAT** from TD-PBE0 calculations using the PBE0 geometries at the ground state ( $S_0$ ) and first singlet excited state ( $S_1$ ) optimised geometries in THF

| state | $\lambda_{\text{calc}}$ (/nm) | $f_{\text{calc}}$ | Major contribution                                                                                      |
|-------|-------------------------------|-------------------|---------------------------------------------------------------------------------------------------------|
| $S_0$ |                               |                   |                                                                                                         |
| 1     | 450.03                        | 0.0819            | HOMO-1 → LUMO+1 (12.94%)<br>HOMO → LUMO (86.46%)                                                        |
| 2     | 447.27                        | 0.0000            | HOMO-1 → LUMO (55.23%)<br>HOMO → LUMO+1 (44.23%)                                                        |
| 3     | 434.38                        | 0.3207            | HOMO-1 → LUMO+1 (86.38%)<br>HOMO → LUMO (12.84%)                                                        |
| 4     | 416.81                        | 0.0117            | HOMO-1 → LUMO (43.65%)<br>HOMO → LUMO+1 (54.57%)                                                        |
| 5     | 332.24                        | 0.0151            | HOMO-3 → LUMO+1 (18.50%)<br>HOMO-2 → LUMO (44.26%)<br>HOMO-1 → LUMO+5 (8.89%)<br>HOMO → LUMO+4 (21.31%) |
| $S_1$ |                               |                   |                                                                                                         |
| 1     | 626.50                        | 0.5279            | HOMO → LUMO (98.96%)                                                                                    |
| 2     | 465.50                        | 0.2310            | HOMO-1 → LUMO (98.56%)                                                                                  |
| 3     | 439.72                        | 0.0020            | HOMO → LUMO+1 (97.89%)                                                                                  |
| 4     | 403.54                        | 0.0918            | HOMO-1 → LUMO+1 (99.52%)                                                                                |
| 5     | 373.15                        | 0.0185            | HOMO-4 → LUMO (10.80%)<br>HOMO-2 → LUMO (76.61%)                                                        |

**Table S4** Molecular orbital energies (in eV) and molecular orbital distributions (in %) of **9biAT** at the ground state ( $S_0$ ) and first singlet excited state ( $S_1$ ) optimised geometries in THF

|        | E (eV) | anthran<br>cene1 | carborane1 | carborane<br>phenyl1 | anthran<br>cene2 | carborane2 | carborane<br>phenyl2 |
|--------|--------|------------------|------------|----------------------|------------------|------------|----------------------|
| $S_0$  |        |                  |            |                      |                  |            |                      |
| LUMO+3 | -1.32  | 5.33             | 17.91      | 26.77                | 5.33             | 17.90      | 26.76                |
| LUMO+2 | -1.32  | 5.12             | 18.32      | 26.55                | 5.13             | 18.33      | 26.56                |
| LUMO+1 | -2.50  | 41.43            | 8.25       | 0.33                 | 41.42            | 8.25       | 0.33                 |
| LUMO   | -2.56  | 40.08            | 9.57       | 0.35                 | 40.09            | 9.57       | 0.35                 |
| HOMO   | -6.01  | 47.47            | 2.47       | 0.07                 | 47.46            | 2.47       | 0.07                 |
| HOMO-1 | -6.04  | 47.59            | 2.31       | 0.10                 | 47.60            | 2.31       | 0.10                 |
| HOMO-2 | -7.22  | 49.13            | 0.13       | 0.74                 | 49.13            | 0.13       | 0.74                 |
| HOMO-3 | -7.31  | 48.34            | 0.73       | 0.93                 | 48.34            | 0.73       | 0.93                 |
| $S_1$  |        |                  |            |                      |                  |            |                      |
| LUMO+3 | -1.30  | 1.40             | 0.01       | 0.00                 | 6.06             | 33.01      | 59.51                |
| LUMO+2 | -2.02  | 62.03            | 28.43      | 9.00                 | 0.52             | 0.00       | 0.01                 |
| LUMO+1 | -2.69  | 1.90             | 0.18       | 0.04                 | 87.77            | 7.88       | 0.23                 |
| LUMO   | -3.50  | 32.51            | 59.73      | 5.63                 | 2.07             | 0.05       | 0.00                 |
| HOMO   | -5.97  | 81.14            | 12.64      | 3.00                 | 3.10             | 0.07       | 0.06                 |
| HOMO-1 | -6.16  | 2.99             | 0.38       | 0.06                 | 92.05            | 4.44       | 0.07                 |
| HOMO-2 | -7.36  | 9.44             | 9.90       | 35.70                | 43.58            | 0.11       | 1.28                 |
| HOMO-3 | -7.38  | 17.71            | 10.56      | 37.27                | 33.63            | 0.20       | 0.63                 |

**Table S5** Cartesian coordinates of the ground state ( $S_0$ ) fully optimised geometry of **9biAT** in THF from TD-PBE0 calculations (in Å).

| Atom | X         | Y         | Z         | H | 4.651927  | -1.842982 | 1.680880  | H | -1.481259 | 4.389484  | 2.790043  |
|------|-----------|-----------|-----------|---|-----------|-----------|-----------|---|-----------|-----------|-----------|
| C    | -5.488528 | -0.892841 | 0.452071  | B | 6.764906  | -1.784584 | 0.224675  | C | -1.090582 | 2.761205  | 1.471513  |
| C    | -5.012815 | 0.453254  | -0.659410 | H | 6.758343  | -2.953429 | 0.020970  | H | -0.028279 | 2.737753  | 1.687770  |
| B    | -5.915627 | 0.711466  | 0.804141  | B | 7.048894  | -0.619329 | -1.063525 | C | -1.604989 | 1.835480  | 0.512342  |
| H    | -5.401616 | 1.237075  | 1.722238  | H | 7.244178  | -0.959171 | -2.183417 | C | -0.727540 | 0.975454  | -0.168993 |
| B    | -7.048877 | -0.619573 | 1.063362  | B | 5.915631  | 0.711639  | -0.804018 | C | -1.208283 | 0.196134  | -1.232278 |
| H    | -7.244181 | -0.959649 | 2.183180  | H | 5.401624  | 1.237451  | -1.721996 | C | -0.294710 | -0.551494 | -2.037213 |
| B    | -6.764880 | -1.784566 | -0.225072 | B | 6.335920  | 1.525609  | 0.721681  | H | 0.753430  | -0.558825 | -1.757555 |
| H    | -6.758298 | -2.953454 | -0.021609 | H | 6.104505  | 2.675737  | 0.886748  | C | -0.708635 | -1.209549 | -3.157421 |
| B    | -5.467619 | -1.126738 | -1.228707 | B | 7.608384  | 0.889789  | -0.333478 | H | 0.003267  | -1.753607 | -3.769301 |
| H    | -4.651912 | -1.842643 | -1.681296 | H | 8.319973  | 1.631759  | -0.931784 | C | -2.068250 | -1.132472 | -3.540166 |
| B    | -6.050827 | 0.361347  | -2.008399 | B | 8.141639  | -0.673128 | 0.331877  | H | -2.392933 | -1.579136 | -4.475167 |
| H    | -5.621298 | 0.710716  | -3.056084 | H | 9.254911  | -1.076469 | 0.212848  | C | -2.982001 | -0.484190 | -2.755874 |
| B    | -7.144391 | -1.011349 | -1.767923 | B | 7.144412  | -1.011686 | 1.767683  | H | -3.995245 | -0.412345 | -3.117226 |
| H    | -7.518531 | -1.652190 | -2.697571 | H | 7.518567  | -1.652718 | 2.697193  | C | -2.619804 | 0.167764  | -1.536015 |
| B    | -8.141622 | -0.673095 | -0.332050 | B | 6.050845  | 0.360953  | 2.008455  | C | 3.544684  | 0.833034  | 0.674389  |
| H    | -9.254892 | -1.076466 | -0.213106 | H | 5.621321  | 0.710104  | 3.056215  | C | 3.021718  | 1.804446  | -0.233748 |
| B    | -7.608382 | 0.889691  | 0.333622  | B | 7.699551  | 0.641464  | 1.424523  | C | 3.800639  | 2.830783  | -0.853967 |
| H    | -8.319984 | 1.631529  | 0.932078  | H | 8.483804  | 1.212480  | 2.113910  | H | 4.836888  | 2.950427  | -0.582871 |
| B    | -6.335919 | 1.525739  | -0.721392 | C | 4.443633  | -1.568468 | -1.287597 | C | 3.262796  | 3.735571  | -1.727416 |
| H    | -6.104511 | 2.675902  | -0.886225 | C | 3.802590  | -2.722852 | -0.822737 | H | 3.896426  | 4.514294  | -2.141203 |
| B    | -7.699537 | 0.641722  | -1.424426 | H | 4.021561  | -3.105076 | 0.167392  | C | 1.893270  | 3.682448  | -2.076738 |
| H    | -8.483788 | 1.212875  | -2.113701 | C | 2.898083  | -3.402748 | -1.629992 | H | 1.481267  | 4.390006  | -2.789217 |
| C    | -4.443635 | -1.568720 | 1.287300  | H | 2.415120  | -4.299251 | -1.254011 | C | 1.090593  | 2.761461  | -1.471014 |
| C    | -3.802160 | -2.722706 | 0.822055  | C | 2.624034  | -2.944597 | -2.915728 | H | 0.028295  | 2.738036  | -1.687295 |
| H    | -4.020768 | -3.104512 | -0.168315 | H | 1.929363  | -3.486403 | -3.550692 | C | 1.604998  | 1.835561  | -0.512010 |
| C    | -2.897680 | -3.402744 | 1.629223  | C | 3.256282  | -1.796857 | -3.386889 | C | 0.727547  | 0.975421  | 0.169178  |
| H    | -2.414371 | -4.298934 | 1.252941  | H | 3.055918  | -1.433931 | -4.390313 | C | 1.208290  | 0.195914  | 1.232326  |
| C    | -2.624104 | -2.945142 | 2.915256  | C | 4.160433  | -1.113664 | -2.580419 | C | 0.294708  | -0.551829 | 2.037144  |
| H    | -1.929466 | -3.487078 | 3.550146  | H | 4.659481  | -0.233921 | -2.969632 | H | -0.753436 | -0.559080 | 1.757500  |
| C    | -3.256788 | -1.797800 | 3.386802  | C | -3.544675 | 0.833175  | -0.674243 | C | 0.708633  | -1.210092 | 3.157230  |
| H    | -3.056793 | -1.435309 | 4.390457  | C | -3.021712 | 1.804411  | 0.234083  | H | -0.003276 | -1.754227 | 3.769033  |
| C    | -4.160906 | -1.114464 | 2.580419  | C | -3.800638 | 2.830613  | 0.854519  | C | 2.068260  | -1.133134 | 3.539957  |
| H    | -4.660308 | -0.235048 | 2.969920  | H | -4.836892 | 2.950296  | 0.583457  | H | 2.392948  | -1.579985 | 4.474866  |
| C    | 5.488544  | -0.892731 | -0.452274 | C | -3.262796 | 3.735231  | 1.728144  | C | 2.982016  | -0.484736 | 2.755766  |
| C    | 5.012826  | 0.453126  | 0.659486  | H | -3.896431 | 4.513859  | 2.142098  | H | 3.995270  | -0.412996 | 3.117108  |
| B    | 5.467637  | -1.126976 | 1.228454  | C | -1.893263 | 3.682060  | 2.077432  | C | 2.619815  | 0.167462  | 1.536039  |

**Table S6** Cartesian coordinates of the first excited state ( $S_1$ ) fully optimised geometry of **9biAT** in THF from TD-PBE0 calculations (in Å)

| Atom | X         | Y         | Z         | H | 4.512946  | -0.786315 | 2.202915  | H | -1.805589 | 5.306984  | 0.268001  |
|------|-----------|-----------|-----------|---|-----------|-----------|-----------|---|-----------|-----------|-----------|
| C    | -5.408965 | -0.689303 | 0.798420  | B | 6.734880  | -1.532678 | 1.051226  | C | -1.285817 | 3.249011  | -0.038072 |
| C    | -5.001852 | -0.039798 | -0.791542 | H | 6.816078  | -2.621157 | 1.528979  | H | -0.235771 | 3.390012  | 0.190128  |
| B    | -5.962783 | 0.857909  | 0.338347  | B | 7.014981  | -1.151092 | -0.662698 | C | -1.719680 | 1.956556  | -0.405779 |
| H    | -5.496484 | 1.792721  | 0.879783  | H | 7.310780  | -1.947543 | -1.498055 | C | -0.756495 | 0.929300  | -0.553179 |
| B    | -7.010127 | -0.262742 | 1.206889  | B | 5.732817  | 0.118215  | -0.956610 | C | -1.170685 | -0.303513 | -1.109845 |
| H    | -7.212597 | -0.036825 | 2.352799  | H | 5.202477  | 0.150458  | -2.017542 | C | -0.199787 | -1.284498 | -1.409845 |
| B    | -6.615775 | -1.886426 | 0.646673  | B | 6.266450  | 1.677038  | -0.162003 | H | 0.826012  | -1.104537 | -1.110026 |
| H    | -6.539875 | -2.798840 | 1.399593  | H | 6.185839  | 2.765782  | -0.635639 | C | -0.531476 | -2.436164 | -2.101073 |
| B    | -5.335539 | -1.726203 | -0.553718 | B | 7.476403  | 0.545360  | -0.766973 | H | 0.235154  | -3.167185 | -2.332139 |
| H    | -4.456826 | -2.506278 | -0.604360 | H | 8.177901  | 0.912587  | -1.660036 | C | -1.848578 | -2.617983 | -2.527519 |
| B    | -5.973695 | -0.834170 | -1.953020 | B | 8.072965  | -0.462047 | 0.585526  | H | -2.113068 | -3.476350 | -3.135616 |
| H    | -5.518285 | -0.995458 | -3.034553 | H | 9.205718  | -0.823923 | 0.690121  | C | -2.835649 | -1.710192 | -2.180222 |
| B    | -6.995744 | -1.988010 | -1.077090 | B | 7.027077  | -0.066407 | 1.981872  | H | -3.828793 | -1.873771 | -2.567315 |
| H    | -7.299681 | -3.021189 | -1.579156 | H | 7.397572  | -0.149224 | 3.113459  | C | -2.556362 | -0.551295 | -1.414646 |
| B    | -8.051985 | -1.061002 | 0.014710  | B | 5.984816  | 1.293461  | 1.562770  | C | 3.498783  | 1.335281  | 0.238626  |
| H    | -9.141482 | -1.429644 | 0.315288  | H | 5.691732  | 2.092375  | 2.394602  | C | 2.948264  | 1.719447  | -1.046579 |
| B    | -7.639961 | 0.661030  | -0.162832 | B | 7.624011  | 1.203290  | 0.882649  | C | 3.737739  | 2.244407  | -2.099121 |
| H    | -8.411996 | 1.549803  | -0.001664 | H | 8.430123  | 2.026178  | 1.197604  | H | 4.788586  | 2.421497  | -1.925912 |
| B    | -6.370554 | 0.790298  | -1.392467 | C | 4.532401  | -2.290677 | -0.403807 | C | 3.212032  | 2.572459  | -3.329063 |
| H    | -6.185855 | 1.721948  | -2.099829 | C | 3.863594  | -3.057694 | 0.561989  | H | 3.859562  | 2.984561  | -4.096924 |
| B    | -7.652633 | -0.413410 | -1.581932 | H | 4.054766  | -2.872407 | 1.613915  | C | 1.842670  | 2.382860  | -3.585057 |
| H    | -8.441492 | -0.300430 | -2.464064 | C | 2.972131  | -4.057471 | 0.189685  | H | 1.425656  | 2.629902  | -4.556904 |
| C    | -4.353475 | -0.800383 | 1.858534  | H | 2.472566  | -4.642405 | 0.956808  | C | 1.029419  | 1.908417  | -2.587120 |
| C    | -3.605234 | -1.975656 | 1.994429  | C | 2.727342  | -4.316640 | -1.157740 | H | -0.033422 | 1.796170  | -2.776818 |
| H    | -3.749676 | -2.798966 | 1.304828  | H | 2.041693  | -5.107852 | -1.448135 | C | 1.539130  | 1.590684  | -1.296005 |
| C    | -2.687297 | -2.110820 | 3.029280  | C | 3.382666  | -3.560481 | -2.128335 | C | 0.675137  | 1.175752  | -0.255797 |
| H    | -2.118432 | -3.030397 | 3.122048  | H | 3.208636  | -3.756933 | -3.182719 | C | 1.153404  | 1.060160  | 1.068537  |
| C    | -2.509387 | -1.080117 | 3.947655  | C | 4.272552  | -2.558423 | -1.755965 | C | 0.259421  | 0.822202  | 2.150738  |
| H    | -1.801482 | -1.194009 | 4.762799  | H | 4.784078  | -1.982676 | -2.520402 | H | -0.797010 | 0.680946  | 1.943734  |
| C    | -3.252700 | 0.090665  | 3.822656  | C | -3.553498 | 0.387317  | -0.994478 | C | 0.698548  | 0.795905  | 3.450047  |
| H    | -3.129527 | 0.896705  | 4.539162  | C | -3.113323 | 1.714173  | -0.672628 | H | -0.007583 | 0.635508  | 4.259036  |
| C    | -4.169792 | 0.231130  | 2.786630  | C | -3.961106 | 2.848584  | -0.669861 | C | 2.061892  | 1.001883  | 3.725814  |
| H    | -4.757480 | 1.139269  | 2.718498  | H | -4.988335 | 2.756190  | -0.982820 | H | 2.415230  | 1.020749  | 4.752251  |
| C    | 5.516395  | -1.256235 | -0.008869 | C | -3.496692 | 4.114810  | -0.354478 | C | 2.956107  | 1.181916  | 2.694188  |
| C    | 4.887160  | 0.993964  | 0.388999  | H | -4.185267 | 4.951991  | -0.393155 | H | 3.994960  | 1.348061  | 2.936871  |
| B    | 5.341165  | -0.414917 | 1.438752  | C | -2.161342 | 4.318599  | -0.000661 | C | 2.559756  | 1.191271  | 1.334425  |

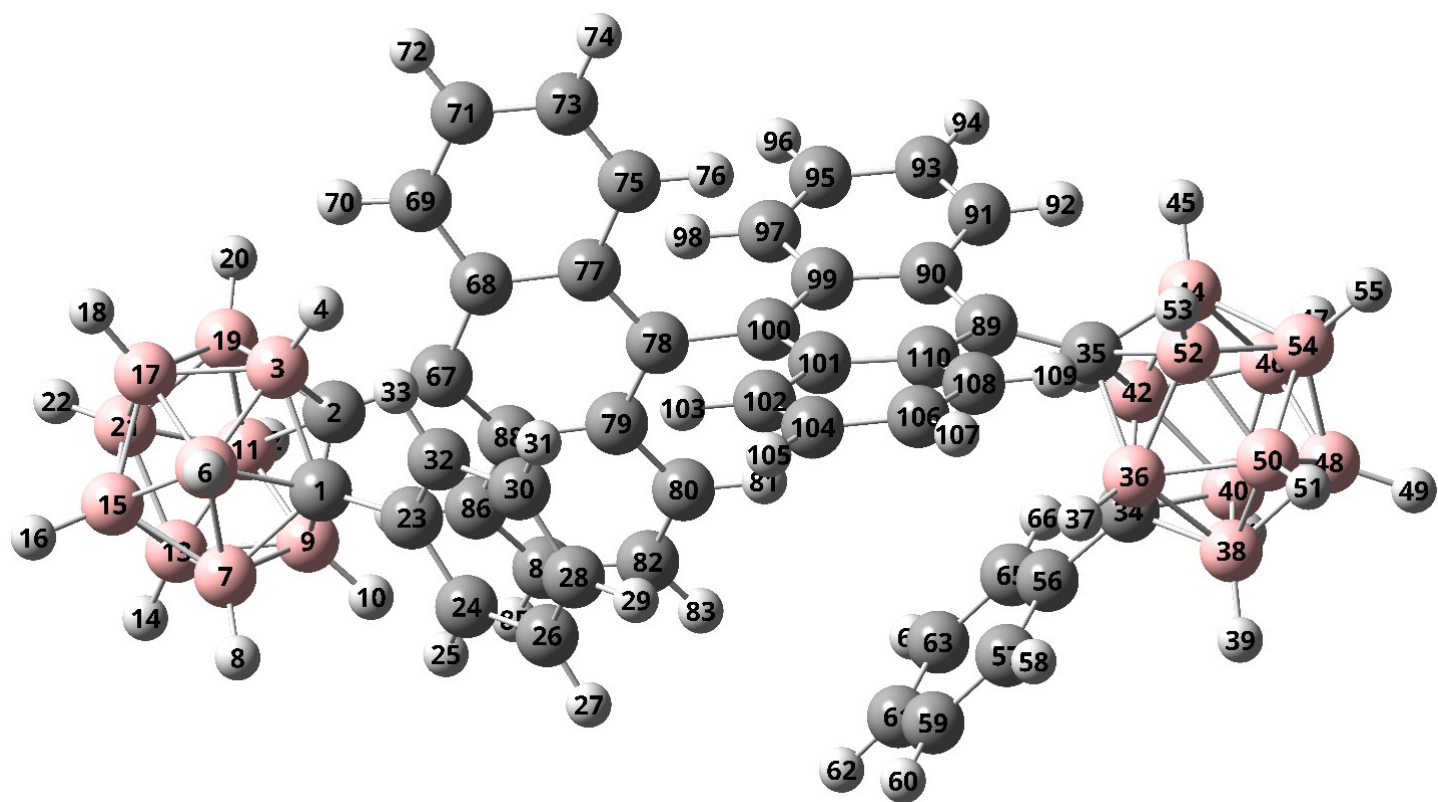

Fig. S8 Atomic tag for **9biAT** in S<sub>1</sub>-optimized geometry.

**Table S7** Calculated atomic charge for **9biAT** in S<sub>1</sub>-optimized geometry in cyclohexane.

| Tag | Atom | Charge   |    |   |          |    |   |          |    |   |          |     |   |          |
|-----|------|----------|----|---|----------|----|---|----------|----|---|----------|-----|---|----------|
|     |      |          | 22 | H | 0.00471  | 45 | H | 0.02491  | 68 | C | 0.05680  | 91  | C | -0.14812 |
| 1   | C    | -0.31643 | 23 | C | 0.13372  | 46 | B | 0.05194  | 69 | C | -0.16340 | 92  | H | 0.16039  |
| 2   | C    | -0.30391 | 24 | C | -0.11663 | 47 | H | -0.00542 | 70 | H | 0.16103  | 93  | C | -0.13192 |
| 3   | B    | 0.01109  | 25 | H | 0.15892  | 48 | B | -0.10138 | 71 | C | -0.14029 | 94  | H | 0.15439  |
| 4   | H    | 0.06631  | 26 | C | -0.14694 | 49 | H | -0.00302 | 72 | H | 0.14770  | 95  | C | -0.14102 |
| 5   | B    | 0.02216  | 27 | H | 0.14922  | 50 | B | 0.05166  | 73 | C | -0.14081 | 96  | H | 0.15071  |
| 6   | H    | 0.03085  | 28 | C | -0.11788 | 51 | H | -0.00581 | 74 | H | 0.14706  | 97  | C | -0.12884 |
| 7   | B    | 0.02367  | 29 | H | 0.14428  | 52 | B | 0.00696  | 75 | C | -0.14699 | 98  | H | 0.15666  |
| 8   | H    | 0.03068  | 30 | C | -0.15467 | 53 | H | 0.02439  | 76 | H | 0.14989  | 99  | C | 0.08510  |
| 9   | B    | 0.01144  | 31 | H | 0.14821  | 54 | B | -0.07578 | 77 | C | 0.07350  | 100 | C | -0.14458 |
| 10  | H    | 0.06627  | 32 | C | -0.11929 | 55 | H | -0.00371 | 78 | C | -0.11675 | 101 | C | 0.08328  |
| 11  | B    | 0.00740  | 33 | H | 0.15963  | 56 | C | 0.12724  | 79 | C | 0.07747  | 102 | C | -0.13005 |
| 12  | H    | 0.03408  | 34 | C | -0.28530 | 57 | C | -0.12778 | 80 | C | -0.14846 | 103 | H | 0.15951  |
| 13  | B    | -0.00347 | 35 | C | -0.26748 | 58 | H | 0.15425  | 81 | H | 0.15582  | 104 | C | -0.13922 |
| 14  | H    | 0.00307  | 36 | B | -0.05796 | 59 | C | -0.14676 | 82 | C | -0.13668 | 105 | H | 0.13796  |
| 15  | B    | -0.09407 | 37 | H | 0.03502  | 60 | H | 0.14435  | 83 | H | 0.13848  | 106 | C | -0.13252 |
| 16  | H    | 0.00557  | 38 | B | 0.03053  | 61 | C | -0.12242 | 84 | C | -0.13919 | 107 | H | 0.15315  |
| 17  | B    | -0.00315 | 39 | H | 0.02233  | 62 | H | 0.14317  | 85 | H | 0.14634  | 108 | C | -0.14847 |
| 18  | H    | 0.00318  | 40 | B | 0.02946  | 63 | C | -0.14985 | 86 | C | -0.16757 | 109 | H | 0.16028  |
| 19  | B    | 0.00592  | 41 | H | 0.02265  | 64 | H | 0.14503  | 87 | H | 0.16261  | 110 | C | 0.04060  |
| 20  | H    | 0.03523  | 42 | B | -0.05903 | 65 | C | -0.12846 | 88 | C | 0.05296  |     |   |          |
| 21  | B    | -0.08043 | 43 | H | 0.03657  | 66 | H | 0.15545  | 89 | C | 0.06393  |     |   |          |
|     |      |          | 44 | B | 0.00665  | 67 | C | 0.05506  | 90 | C | 0.04302  |     |   |          |



**Table S8** Calculated atomic charge for **9biAT** in S<sub>1</sub>-optimized geometry in tetrahydrofuran.

| Tag | Atom | Charge   |    |   |          |    |   |          |    |   |          |     |   |          |
|-----|------|----------|----|---|----------|----|---|----------|----|---|----------|-----|---|----------|
|     |      |          | 22 | H | -0.00047 | 45 | H | 0.02907  | 68 | C | 0.05696  | 91  | C | -0.15316 |
| 1   | C    | -0.31477 | 23 | C | 0.13156  | 46 | B | 0.04650  | 69 | C | -0.16810 | 92  | H | 0.16210  |
| 2   | C    | -0.30367 | 24 | C | -0.12317 | 47 | H | -0.01011 | 70 | H | 0.16385  | 93  | C | -0.13403 |
| 3   | B    | 0.01011  | 25 | H | 0.16369  | 48 | B | -0.10619 | 71 | C | -0.14359 | 94  | H | 0.16272  |
| 4   | H    | 0.07235  | 26 | C | -0.15248 | 49 | H | -0.00999 | 72 | H | 0.15532  | 95  | C | -0.14489 |
| 5   | B    | 0.01991  | 27 | H | 0.15738  | 50 | B | 0.04611  | 73 | C | -0.14522 | 96  | H | 0.15963  |
| 6   | H    | 0.03246  | 28 | C | -0.12256 | 51 | H | -0.01026 | 74 | H | 0.15500  | 97  | C | -0.13303 |
| 7   | B    | 0.02138  | 29 | H | 0.15446  | 52 | B | 0.00379  | 75 | C | -0.15186 | 98  | H | 0.16135  |
| 8   | H    | 0.03213  | 30 | C | -0.15777 | 53 | H | 0.02881  | 76 | H | 0.15412  | 99  | C | 0.08633  |
| 9   | B    | 0.01008  | 31 | H | 0.15710  | 54 | B | -0.08017 | 77 | C | 0.07483  | 100 | C | -0.14159 |
| 10  | H    | 0.07265  | 32 | C | -0.12494 | 55 | H | -0.01052 | 78 | C | -0.11537 | 101 | C | 0.08474  |
| 11  | B    | 0.00443  | 33 | H | 0.16426  | 56 | C | 0.12473  | 79 | C | 0.07766  | 102 | C | -0.13301 |
| 12  | H    | 0.03881  | 34 | C | -0.28342 | 57 | C | -0.13402 | 80 | C | -0.15311 | 103 | H | 0.16068  |
| 13  | B    | -0.00766 | 35 | C | -0.26726 | 58 | H | 0.15817  | 81 | H | 0.15642  | 104 | C | -0.14292 |
| 14  | H    | 0.00042  | 36 | B | -0.05834 | 59 | C | -0.15221 | 82 | C | -0.14101 | 105 | H | 0.15013  |
| 15  | B    | -0.09776 | 37 | H | 0.03906  | 60 | H | 0.15338  | 83 | H | 0.14690  | 106 | C | -0.13440 |
| 16  | H    | 0.00014  | 38 | B | 0.02817  | 61 | C | -0.12610 | 84 | C | -0.14239 | 107 | H | 0.16232  |
| 17  | B    | -0.00727 | 39 | H | 0.02203  | 62 | H | 0.15369  | 85 | H | 0.15482  | 108 | C | -0.15353 |
| 18  | H    | 0.00044  | 40 | B | 0.02706  | 63 | C | -0.15343 | 86 | C | -0.17195 | 109 | H | 0.16201  |
| 19  | B    | 0.00315  | 41 | H | 0.02238  | 64 | H | 0.15388  | 87 | H | 0.16568  | 110 | C | 0.04089  |
| 20  | H    | 0.03970  | 42 | B | -0.05905 | 65 | C | -0.13437 | 88 | C | 0.05303  |     |   |          |
| 21  | B    | -0.08408 | 43 | H | 0.04003  | 66 | H | 0.15886  | 89 | C | 0.06389  |     |   |          |
|     |      |          | 44 | B | 0.00356  | 67 | C | 0.05435  | 90 | C | 0.04354  |     |   |          |

**Table S9** Calculated atomic charge for **9biAT** in S<sub>1</sub>-optimized geometry in dichloromethane.

| Tag | Atom | Charge   |    |   |          |    |   |          |    |   |          |     |   |          |
|-----|------|----------|----|---|----------|----|---|----------|----|---|----------|-----|---|----------|
|     |      |          | 22 | H | -0.00087 | 45 | H | 0.02935  | 68 | C | 0.05695  | 91  | C | -0.15337 |
| 1   | C    | -0.31459 | 23 | C | 0.13111  | 46 | B | 0.04596  | 69 | C | -0.16764 | 92  | H | 0.16220  |
| 2   | C    | -0.30351 | 24 | C | -0.12295 | 47 | H | -0.01047 | 70 | H | 0.16371  | 93  | C | -0.13427 |
| 3   | B    | 0.01031  | 25 | H | 0.16404  | 48 | B | -0.10649 | 71 | C | -0.14401 | 94  | H | 0.16333  |
| 4   | H    | 0.07303  | 26 | C | -0.15294 | 49 | H | -0.01062 | 72 | H | 0.15589  | 95  | C | -0.14513 |
| 5   | B    | 0.01929  | 27 | H | 0.15788  | 50 | B | 0.04563  | 73 | C | -0.14554 | 96  | H | 0.16029  |
| 6   | H    | 0.03272  | 28 | C | -0.12228 | 51 | H | -0.01061 | 74 | H | 0.15559  | 97  | C | -0.13343 |
| 7   | B    | 0.02158  | 29 | H | 0.15526  | 52 | B | 0.00365  | 75 | C | -0.15227 | 98  | H | 0.16170  |
| 8   | H    | 0.03208  | 30 | C | -0.15850 | 53 | H | 0.02902  | 76 | H | 0.15446  | 99  | C | 0.08516  |
| 9   | B    | 0.01033  | 31 | H | 0.15773  | 54 | B | -0.08058 | 77 | C | 0.07455  | 100 | C | -0.13880 |
| 10  | H    | 0.07303  | 32 | C | -0.12593 | 55 | H | -0.01113 | 78 | C | -0.11415 | 101 | C | 0.08413  |
| 11  | B    | 0.00437  | 33 | H | 0.16472  | 56 | C | 0.12434  | 79 | C | 0.07713  | 102 | C | -0.13304 |
| 12  | H    | 0.03897  | 34 | C | -0.28336 | 57 | C | -0.13443 | 80 | C | -0.15341 | 103 | H | 0.16061  |
| 13  | B    | -0.00803 | 35 | C | -0.26703 | 58 | H | 0.15851  | 81 | H | 0.15648  | 104 | C | -0.14360 |
| 14  | H    | 0.00032  | 36 | B | -0.05836 | 59 | C | -0.15282 | 82 | C | -0.14166 | 105 | H | 0.15174  |
| 15  | B    | -0.09790 | 37 | H | 0.03939  | 60 | H | 0.15399  | 83 | H | 0.14790  | 106 | C | -0.13443 |
| 16  | H    | -0.00030 | 38 | B | 0.02785  | 61 | C | -0.12565 | 84 | C | -0.14232 | 107 | H | 0.16302  |
| 17  | B    | -0.00786 | 39 | H | 0.02196  | 62 | H | 0.15446  | 85 | H | 0.15557  | 108 | C | -0.15389 |
| 18  | H    | 0.00027  | 40 | B | 0.02703  | 63 | C | -0.15418 | 86 | C | -0.17263 | 109 | H | 0.16219  |
| 19  | B    | 0.00274  | 41 | H | 0.02221  | 64 | H | 0.15451  | 87 | H | 0.16622  | 110 | C | 0.04055  |
| 20  | H    | 0.04014  | 42 | B | -0.05905 | 65 | C | -0.13498 | 88 | C | 0.05257  |     |   |          |
| 21  | B    | -0.08460 | 43 | H | 0.04017  | 66 | H | 0.15914  | 89 | C | 0.06361  |     |   |          |
|     |      |          | 44 | B | 0.00328  | 67 | C | 0.05397  | 90 | C | 0.04374  |     |   |          |

**Table S10** Calculated atomic charge for **9biAT** in S<sub>1</sub>-optimized geometry in acetone.

| Tag | Atom | Charge   |    |   |          |    |   |          |    |   |          |     |   |          |  |
|-----|------|----------|----|---|----------|----|---|----------|----|---|----------|-----|---|----------|--|
|     |      |          | 22 | H | -0.00192 | 45 | H | 0.03061  | 68 | C | 0.05698  | 91  | C | -0.15471 |  |
| 1   | C    | -0.31409 | 23 | C | 0.13060  | 46 | B | 0.04445  | 69 | C | -0.16958 | 92  | H | 0.16274  |  |
| 2   | C    | -0.30356 | 24 | C | -0.12565 | 47 | H | -0.01121 | 70 | H | 0.16491  | 93  | C | -0.13462 |  |
| 3   | B    | 0.00978  | 25 | H | 0.16543  | 48 | B | -0.10816 | 71 | C | -0.14451 | 94  | H | 0.16522  |  |
| 4   | H    | 0.07443  | 26 | C | -0.15454 | 49 | H | -0.01201 | 72 | H | 0.15764  | 95  | C | -0.14601 |  |
| 5   | B    | 0.01900  | 27 | H | 0.15995  | 50 | B | 0.04403  | 73 | C | -0.14649 | 96  | H | 0.16235  |  |
| 6   | H    | 0.03303  | 28 | C | -0.12413 | 51 | H | -0.01123 | 74 | H | 0.15743  | 97  | C | -0.13453 |  |
| 7   | B    | 0.02052  | 29 | H | 0.15799  | 52 | B | 0.00269  | 75 | C | -0.15350 | 98  | H | 0.16281  |  |
| 8   | H    | 0.03266  | 30 | C | -0.15866 | 53 | H | 0.03047  | 76 | H | 0.15560  | 99  | C | 0.08670  |  |
| 9   | B    | 0.00965  | 31 | H | 0.16008  | 54 | B | -0.08198 | 77 | C | 0.07520  | 100 | C | -0.14051 |  |
| 10  | H    | 0.07480  | 32 | C | -0.12700 | 55 | H | -0.01240 | 78 | C | -0.11499 | 101 | C | 0.08529  |  |
| 11  | B    | 0.00345  | 33 | H | 0.16590  | 56 | C | 0.12370  | 79 | C | 0.07740  | 102 | C | -0.13411 |  |
| 12  | H    | 0.04047  | 34 | C | -0.28267 | 57 | C | -0.13628 | 80 | C | -0.15494 | 103 | H | 0.16069  |  |
| 13  | B    | -0.00919 | 35 | C | -0.26724 | 58 | H | 0.15958  | 81 | H | 0.15634  | 104 | C | -0.14401 |  |
| 14  | H    | -0.00005 | 36 | B | -0.05854 | 59 | C | -0.15410 | 82 | C | -0.14235 | 105 | H | 0.15454  |  |
| 15  | B    | -0.09923 | 37 | H | 0.04048  | 60 | H | 0.15629  | 83 | H | 0.14999  | 106 | C | -0.13482 |  |
| 16  | H    | -0.00144 | 38 | B | 0.02721  | 61 | C | -0.12731 | 84 | C | -0.14324 | 107 | H | 0.16518  |  |
| 17  | B    | -0.00876 | 39 | H | 0.02198  | 62 | H | 0.15728  | 85 | H | 0.15755  | 108 | C | -0.15511 |  |
| 18  | H    | -0.00010 | 40 | B | 0.02609  | 63 | C | -0.15464 | 86 | C | -0.17335 | 109 | H | 0.16269  |  |
| 19  | B    | 0.00223  | 41 | H | 0.02233  | 64 | H | 0.15678  | 87 | H | 0.16689  | 110 | C | 0.04094  |  |
| 20  | H    | 0.04122  | 42 | B | -0.05908 | 65 | C | -0.13653 | 88 | C | 0.05292  |     |   |          |  |
| 21  | B    | -0.08552 | 43 | H | 0.04111  | 66 | H | 0.16002  | 89 | C | 0.06405  |     |   |          |  |
|     |      |          | 44 | B | 0.00249  | 67 | C | 0.05407  | 90 | C | 0.04368  |     |   |          |  |
